# Supplementary material for: The impact of vitamin D supplementation on musculoskeletal health outcomes in children, adolescents, and young adults living with HIV: A systematic review
Source: PLOS journal article supplement (doi:10.1371/journal.pone.0207022), 2018-11-15
Supplement: S4 (10.1371/journal.pone.0207022.s004) [file journal.pone.0207022.s004]

S4 Table. Complete search strategy (Web of Knowledge)

| WEB OF SCIENCE                                                     | Search                                                                                                                                                                                                                                                                                                                                                                                                                                                                                                                                                                                                                                                                                       | Results | Date(DD/MM/YYYY)/Time   |
|--------------------------------------------------------------------|----------------------------------------------------------------------------------------------------------------------------------------------------------------------------------------------------------------------------------------------------------------------------------------------------------------------------------------------------------------------------------------------------------------------------------------------------------------------------------------------------------------------------------------------------------------------------------------------------------------------------------------------------------------------------------------------|---------|-------------------------|
| Subject Query #1<br><br>Children, Adolescence,<br>and Young Adults | ts = paediatric* or ts = pediatric* or ts = adolescen* or ts = child* or ts = "young adult" or ts = minor* or ts = infant* or ts = juvenile*                                                                                                                                                                                                                                                                                                                                                                                                                                                                                                                                                 | 6740579 | 24-12-2017<br><br>19:54 |
| Subject Query #2<br><br>HIV                                        | ts = HIV or ts = human immunodeficiency virus or ts = AIDS or ts = acquired immunodeficiency syndrome or ts = acquired immune deficiency syndrome or ts = HIV-1 or ts = HIV-2                                                                                                                                                                                                                                                                                                                                                                                                                                                                                                                | 1795474 | 24-12-2017<br><br>19:55 |
| Subject Query #3<br><br>Vitamin D                                  | ts = vitamin D or ts = ergocalciferol* or ts = (ergocalciferol near3 derivative*) or ts = calcitriol or ts = cholecalciferol or ts = colecalciferol or ts = calcifediol or ts = (calcifediol near3 derivative*) or ts = calcidiol or ts = 25-hydroxyvitamin D2 or ts = 25-hydroxyvitamin D or ts = 25-hydroxyergocalciferol or ts = 1-25 dihydroxycholecalciferol or ts = 1-25 dihydroxycholecalciferol or ts = 1-25 dihydroxyvitamin d3 or ts = calcidiol 1 monooxygenase or ts = ("vitamin D" near3 metabolism)                                                                                                                                                                            | 195346  | 24-12-2017<br><br>19:56 |
| Combined Query #1                                                  | #1 AND #2 AND #3                                                                                                                                                                                                                                                                                                                                                                                                                                                                                                                                                                                                                                                                             | 639     | 24-12-2017<br><br>19:57 |
| Subject Query #4<br><br>Outcome A - Bone<br>Disease                | ts = (metabolic near3 bone near3 disease*) or ts = osteoporosis or ts = (juvenile near3 osteoporosis) or ts = (primary near3 osteoporosis) or ts = (childhood-onset near3 primary near3 osteoporosis) or ts = (idiopathic near3 juvenile near3 osteoporosis) or ts = osteopenia or ts = ("vitamin D" near3 deficiency) or ts = hypovitaminosis D or ts = osteolysis or ts = (bone near3 deminerali?ation) or ts = (pathologic near3 bone near3 deminerali?ation) or ts = (bone near5 health) or ts = (musculoskeletal near5 health) or ts = (musculoskeletal near3 health) or ts = (skeletal near3 health) or ts = (skeletal near3 deformity) or ts = myopathy or ts = (bone near3 turnover) | 225865  | 24-12-2017<br><br>19:59 |
| Subject Query #5<br><br>Outcome B – Endocrine<br>Markers           | ts = parathyroid hormone* or ts = PTH or ts = phosphorus or ts = phosphate* or ts = calcium or ts = alkaline phosphatase or ts = osteocalcin or ts = PNP-1 or ts = procollagen type 1 N-terminal propeptide or ts = CTX or ts = collagen type 1 cross-linked C-telopeptide                                                                                                                                                                                                                                                                                                                                                                                                                   | 2969359 | 24-12-2017<br><br>19:59 |
